# Supplementary material for: A deep-red fluorescent molecular rotor based on donor-two-acceptor modular system for imaging mitochondrial viscosity
Source: Royal Society of Chemistry journal article supplement (doi:10.1039/d0ra04935b), 2020-01-01
Supplement: d0ra04935b1.pdf [file d0ra04935b1.pdf]

Electronic Supplementary Material (ESI) for Organic & Biomolecular Chemistry.

This journal is © The Royal Society of Chemistry 2020

Electronic Supporting information

## **A deep-red fluorescent molecular rotor based on donor-two-acceptor modular system for imaging mitochondrial viscosity**

**Xiaoxi Yin<sup>a, b, c</sup>, Yiping Cai<sup>a, b, c</sup>, Songtao Cai<sup>a, b</sup>, Xiaojie Jiao<sup>a, b</sup>, Chang Liu<sup>a, b</sup>, Song He<sup>a, b\*</sup>, Xianshun Zeng<sup>a, b\*</sup>**

<sup>a</sup> *Tianjin Key Laboratory for Photoelectric Materials and Devices, Tianjin University of Technology, Tianjin 300384.*

<sup>b</sup> *Key Laboratory of Display Materials and Photoelectric Devices, Ministry of Education, School of Materials Science & Engineering, Tianjin University of Technology, Tianjin, 300384, China.*

<sup>c</sup> *These authors contributed equally to this work.*

E-mail: [hesong@tjut.edu.cn](mailto:hesong@tjut.edu.cn); [xshzeng@tjut.edu.cn](mailto:xshzeng@tjut.edu.cn) Tel.: +86-022-6021-6748

## 1. Materials and instruments

Chemical reagents used in the experiment were purchased from TCI or Sigma-Aldrich companies without secondary treatment. The bio-reagents were purchased from Beyotime Institute of Biotechnology. The deionized water for analysis was obtained from a Milli-Q ultrapure system. NMR spectra were recorded on a Bruker spectrometer at 400 ( $^1\text{H}$  NMR) MHz and 100 ( $^{13}\text{C}$  NMR) MHz. High-resolution mass spectra (HRMS) were acquired on an Agilent 6510 Q-TOF LC/MS instrument. All UV absorption spectra in this paper were done by a Shimadzu UV-2550 UV/Vis spectrophotometer and all fluorescence emission spectra were done by a Hitachi F-4600 fluorophotometer. Fluorescence lifetime test were measured by Edinburgh FLS1000 steady state transient fluorescence spectrometer. Cells were imaged on an Olympus FV100-IX81confocal microscope. All cell images were analyzed with Olympus FV1000-ASW.

## 2. Viscosity spectroscopy measurement

The stock solution of **DpCy7** was  $5 \times 10^{-3}$  M in DMSO. Solvents with different viscosities are obtained by mixing deionized water and glycerol in different ratios. A working solution (e. g. 5.0  $\mu\text{M}$ ) of **DpCy7** of different viscosity was prepared by adding 3  $\mu\text{L}$  of stock solution to 3 mL of the required solvent mixture. The prepared solutions were mixed uniformly by using an oscillator for 1 min and standing for 5 min before UV-vis and fluorescence spectral analysis. Fluorescence spectra of solution were excited at 570 nm with excitation slit width and emission slit width set at 5 nm and 2.5 nm, respectively.

## 3. Measurement of fluorescence quantum yield

Fluorescence quantum yield ( $\Phi_F$ ) was measured by using rhodamine B in ethanol ( $\Phi_F = 0.73$ , in ethanol) as the reference. The quantum yield was calculated by the following equation.<sup>[1]</sup>

$$\Phi_{F(x)} = \Phi_{F(x)} \left( \frac{A_s F_x / A_x F_s}{A_s F_x / A_x F_s} \right) \left( \frac{\eta_x / \eta_s}{\eta_x / \eta_s} \right)^2$$

Where  $\Phi_F$  is the fluorescence quantum yield,  $A$  is the absorbance at the certain excitation wavelength,  $F$  is the area under the corrected emission curve, and  $\eta$  is the refractive index of the solvent. Subscripts  $X$  and  $S$  refer to the unknown and to the standard, respectively.

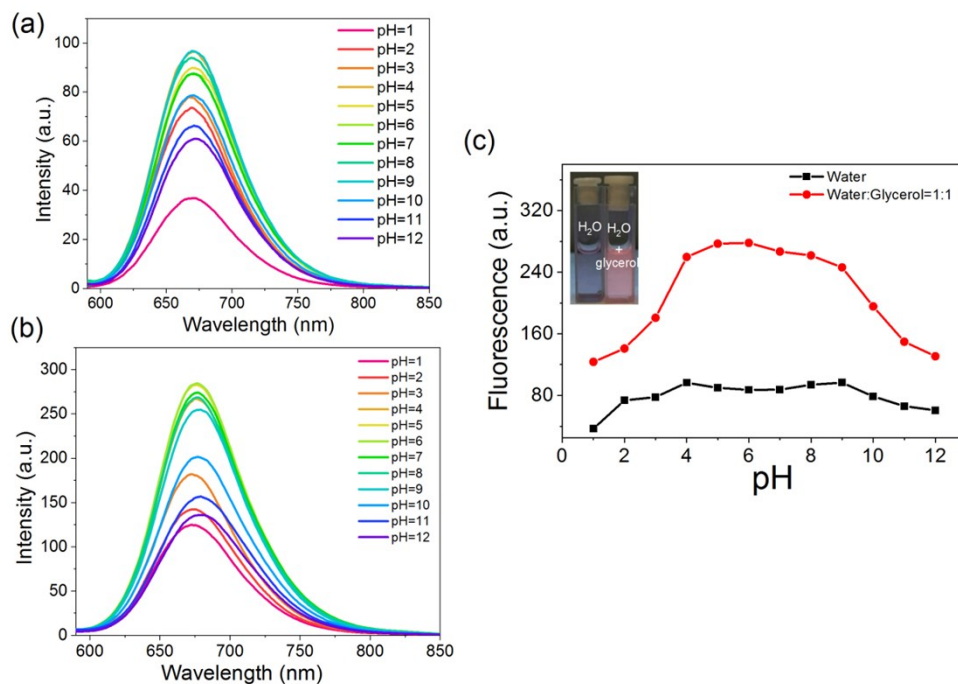

**Fig. S1** (a) Fluorescence spectra of **DpCy7** (5  $\mu\text{M}$ ) in pure water at different pH. (b) Fluorescence spectra of **DpCy7** (5  $\mu\text{M}$ ) in 50% glycerol aqueous solution at different pH. (c) Fluorescence dot plots spectra of **DpCy7** (5  $\mu\text{M}$ ) at 670 nm among different pH in water (black) and 50% glycerol aqueous solution (red). Inset: Color changes of **DpCy7** in the water and glycerol under UV irradiation.

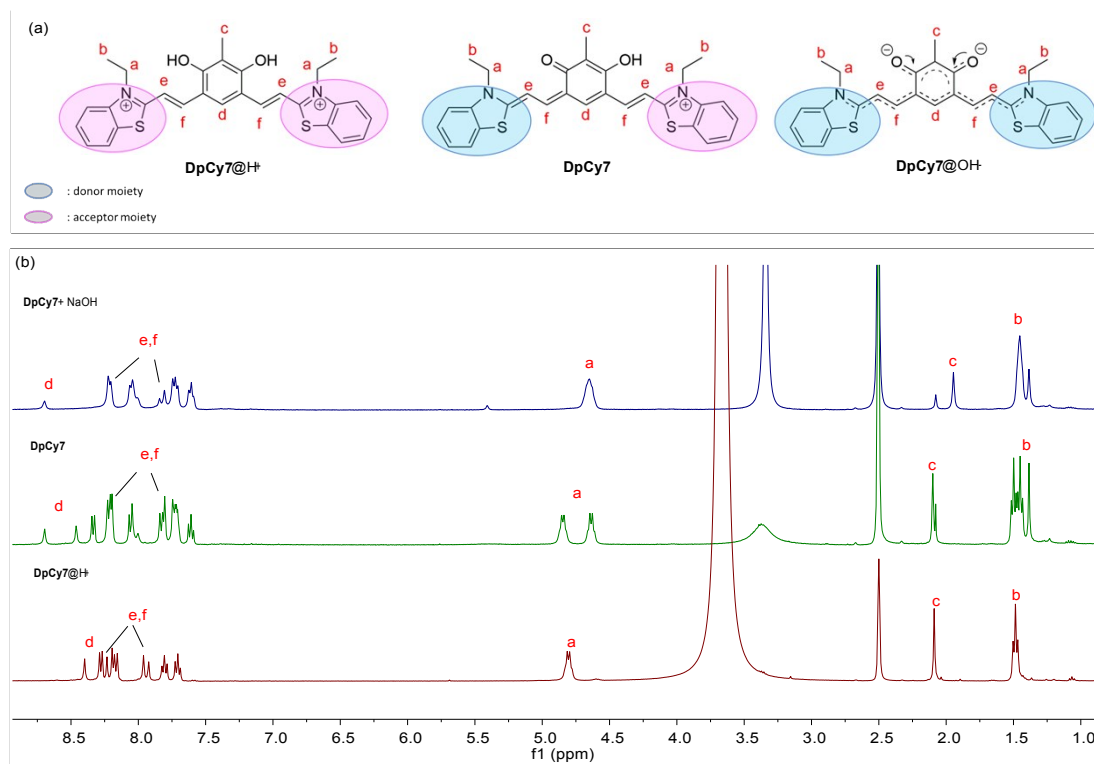

**Fig S2** (a) Three ionization states of the probe **DpCy7** under different pH conditions. (b)  $^1\text{H}$  NMR titration of **DpCy7** with NaOH in  $\text{DMSO-d}_6$ .

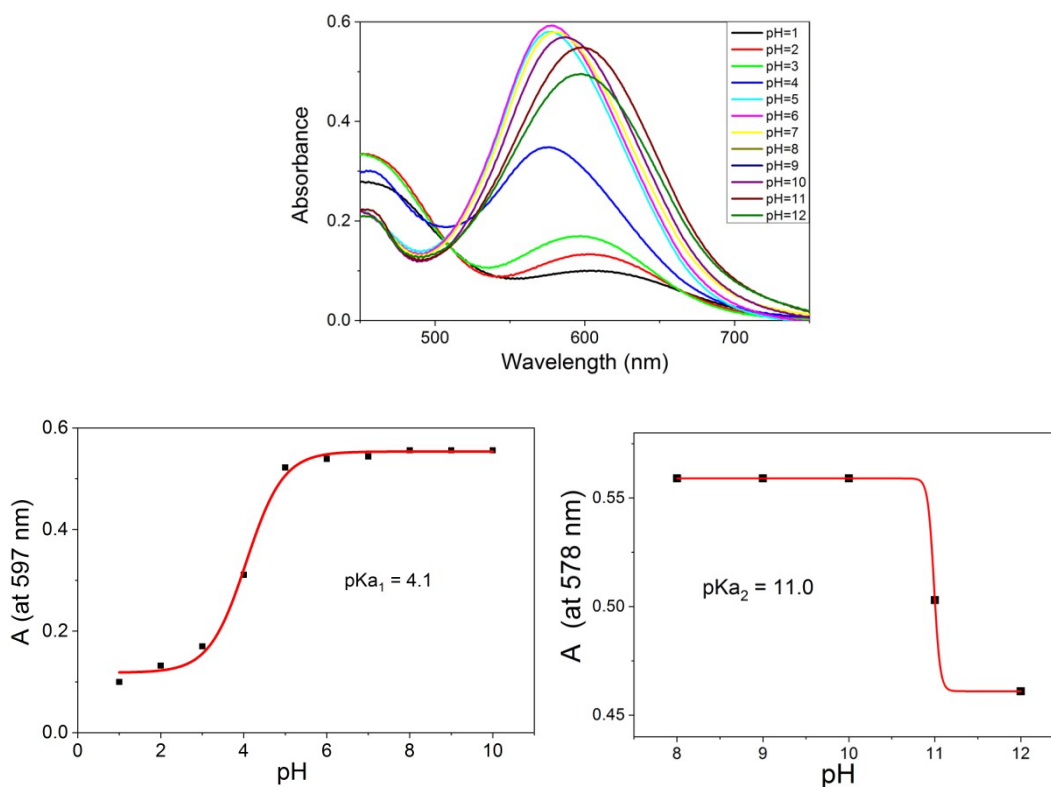

**Fig.S3** a) UV-vis spectra of probe **DpCy7** (10  $\mu$ M) in different pH aqueous solution; b) and c) pH-absorbance fit sigmoidal of **DpCy7**

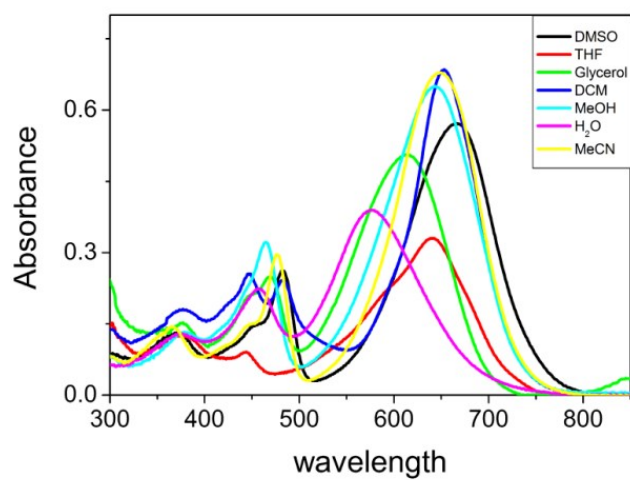

**Fig. S4** UV-vis responses of **DpCy7** (10  $\mu$ M) upon the different solvents: DMSO, tetrahydrofuran, dichloromethane, methanol, H<sub>2</sub>O, acetonitrile and glycerol.

**Table S1** Spectral properties of **DpCy7** in different solvents

| Solvents         | $\lambda_{\text{abs}}(\text{nm})$ | $\lambda_{\text{em}}(\text{nm})$ | Stokes shift (nm) | $\Phi$ |
|------------------|-----------------------------------|----------------------------------|-------------------|--------|
| DMSO             | 667                               | 700                              | 33                | 0.08   |
| THF              | 642                               | 693                              | 51                | 0.12   |
| DCM              | 657                               | 694                              | 37                | 0.09   |
| MeOH             | 643                               | 683                              | 40                | 0.13   |
| H <sub>2</sub> O | 577                               | 670                              | 93                | 0.05   |
| MeCN             | 648                               | 689                              | 41                | 0.10   |
| Glycerol         | 615                               | 688                              | 73                | 0.39   |

**Table S2** HOMO and LUMO energy of **DpCy7@H<sup>+</sup>** and **DpCy7** calculated at B3LYP/6-31G (d) level.

|                            | LUMO (eV) | HOMO (eV) | $\Delta E$ (eV) |
|----------------------------|-----------|-----------|-----------------|
| <b>DpCy7@H<sup>+</sup></b> | -7.91     | -10.92    | 3.01            |
| <b>DpCy7</b>               | -5.20     | -7.47     | 2.27            |

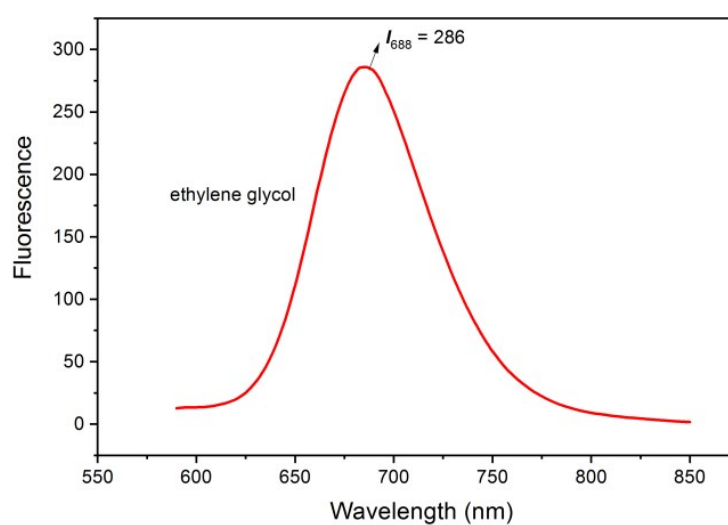**Fig. S5** Fluorescence spectrum of **DpCy7** (5  $\mu\text{M}$ ) in ethylene glycol.

**Table S3** The comparison of the experimental and predicted viscosity for ethylene glycol

|                        | $I_{688}$ | Exp. $\log \eta^{\#}$ | Calc. $\log \eta^{[2]}$ | Error% |
|------------------------|-----------|-----------------------|-------------------------|--------|
| <b>Ethylene glycol</b> | 286       | 1.169                 | 1.244                   | 6.0%   |

$\#$ : calculated by the Förster-Hoffmann equation of  $\log I_{688} = 1.79 + 0.57 \log \eta$

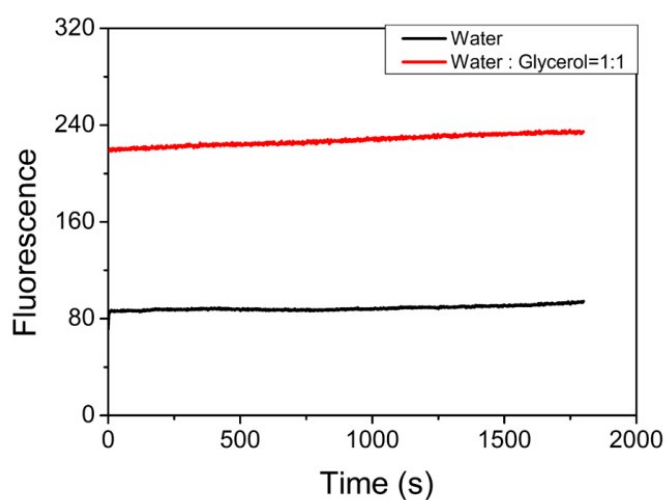

**Fig. S6** Time-dependent fluorescence spectrum of probe **DpCy7** (5 $\mu$ M) in water and 50% water-glycerol.

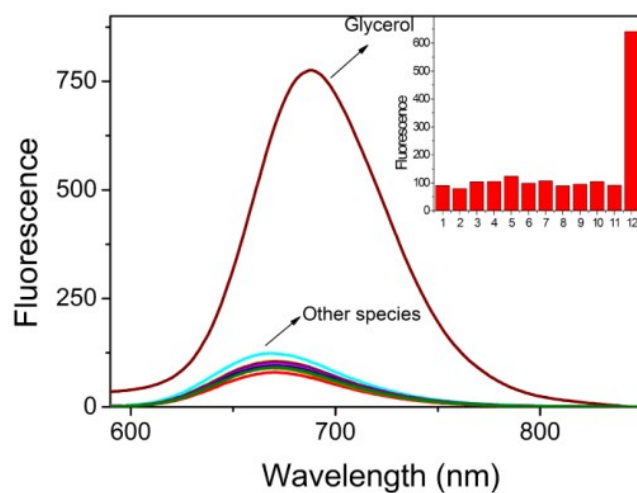

**Fig. S7** Fluorescence spectra of **DpCy7** (5  $\mu$ M) upon the addition of various anion (50  $\mu$ M). (1)  $\text{Cl}^-$ , (2)  $\text{ClO}^-$ , (3) Cys, (4) GSH, (5)  $\text{H}_2\text{O}_2$ , (6) Hcy, (7)  $\text{HSO}_3^-$ , (8)  $\text{HSO}_4^-$ , (9)  $\text{SO}_3^{2-}$ , (10)  $\text{SO}_4^{2-}$ , (11) blank, (12) glycerol.

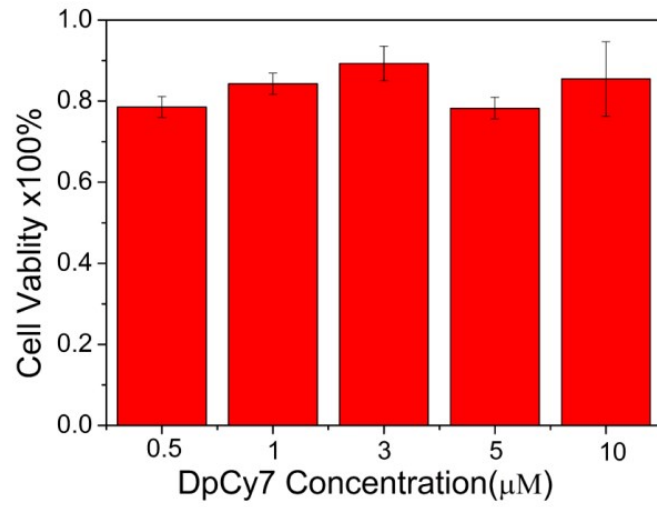

**Fig. S8** The MTT assay of **DpCy7**.

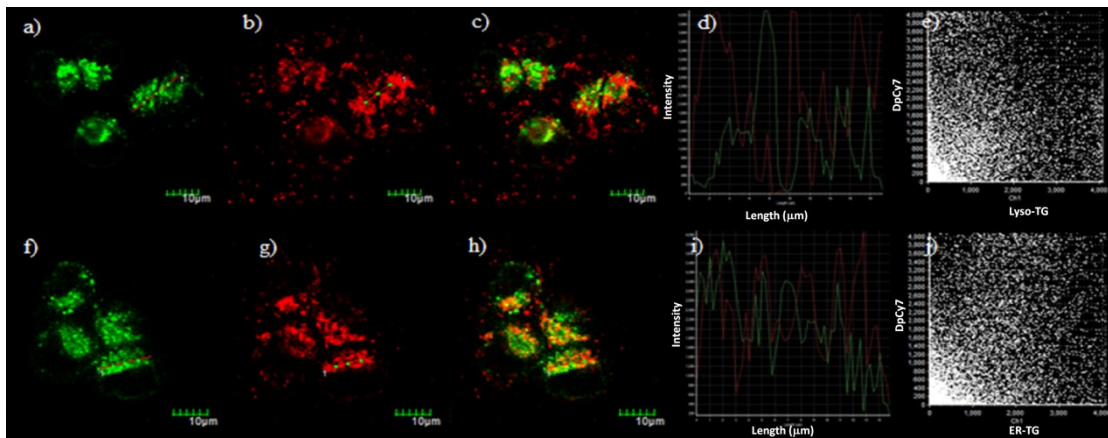

**Fig. S9** Co-localization experiments involving with probe **DpCy7** (0.1 µM) and Lyso Tracker Green (200 nM, a-e) and ER Tracker Green (200 nM). f-j) in HeLa cells incubated with 1 µM monensin at 37°C for 30 min. a) and f): Confocal image with co-localization agents on green channel; b) and g): Confocal image from 0.1 µM probe **DpCy7** on red channel; c) and h): Overlay of green and red channels; d) and i): The intensity profile of ROI lines; e) and j): Fluorescence intensity plot of co-localization agent channel and **DpCy7** channel. Scale bar = 10 µm

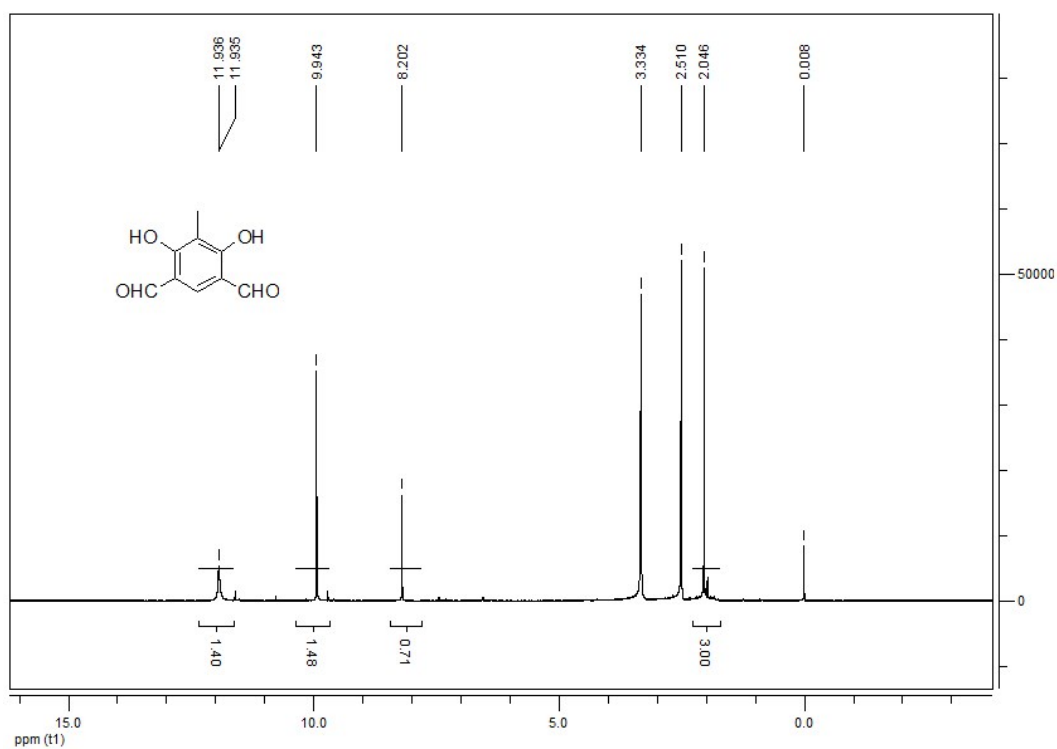

Fig. S10  $^1\text{H}$  NMR of 2, 4-Dihydroxy-3-methylisophthalaldehyde (**1**) (400 MHz,  $\text{DMSO-}d_6$ ).

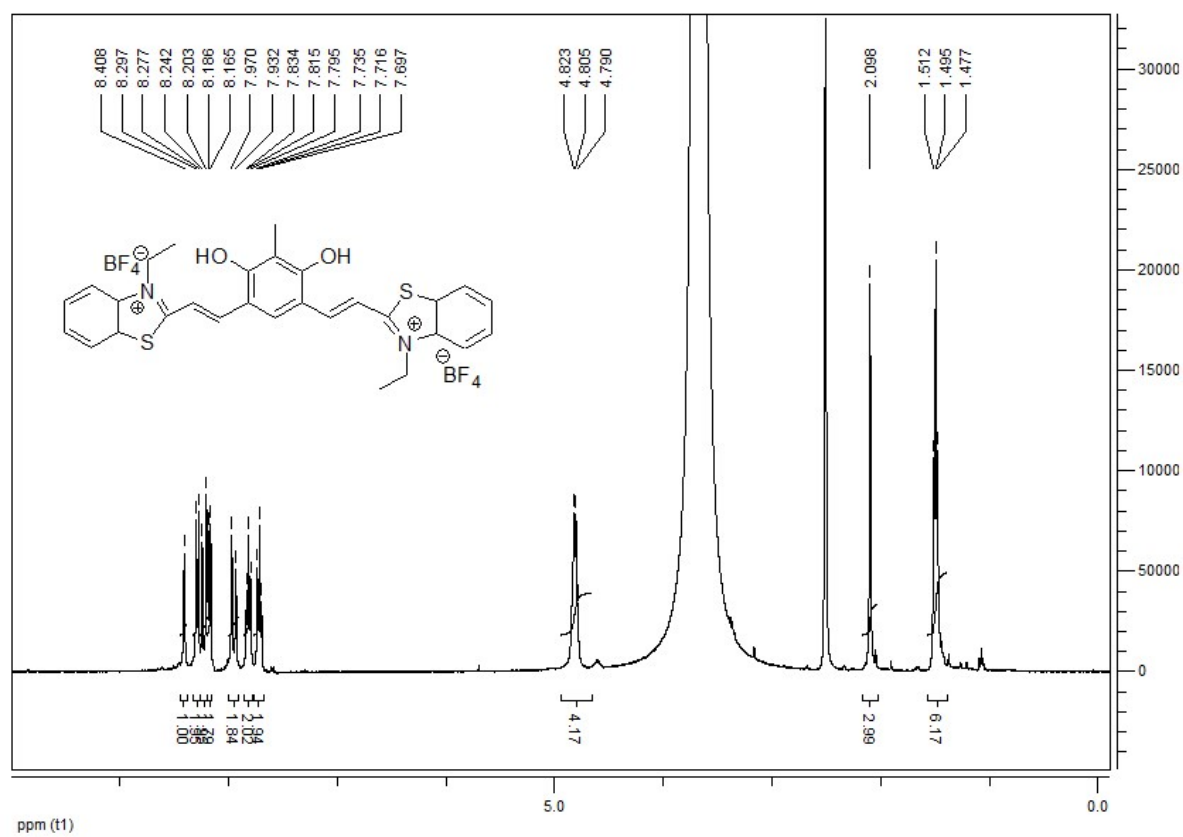

Fig. S11  $^1\text{H}$  NMR of the protonated **DpCy7** (400 MHz,  $\text{DMSO-}d_6$ ).



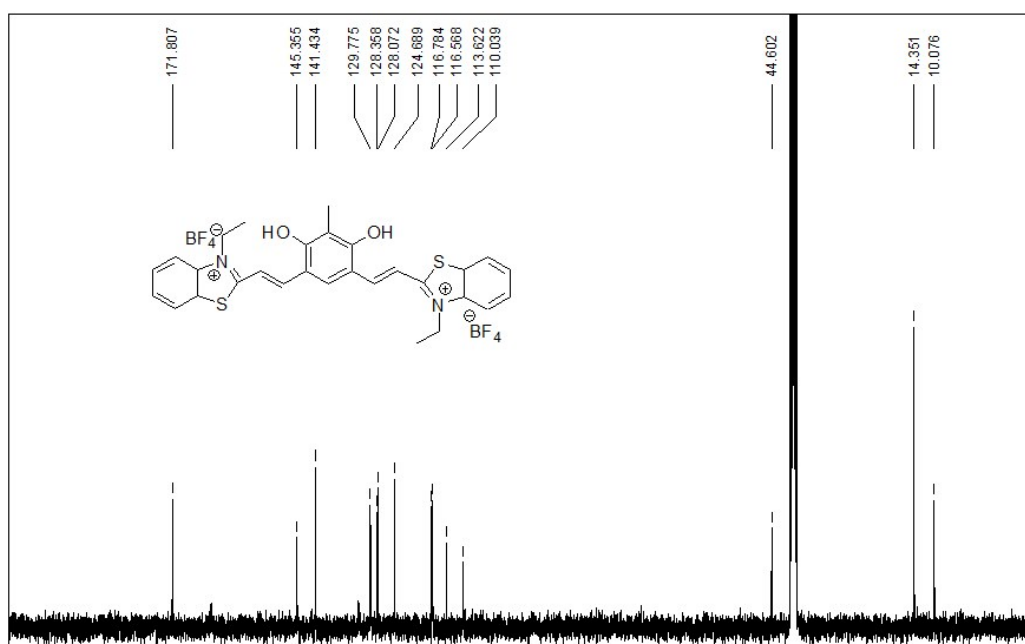

Fig. S12 <sup>13</sup>C NMR of the protonated DpCy7 (100 MHz, DMSO-*d*<sub>6</sub>).

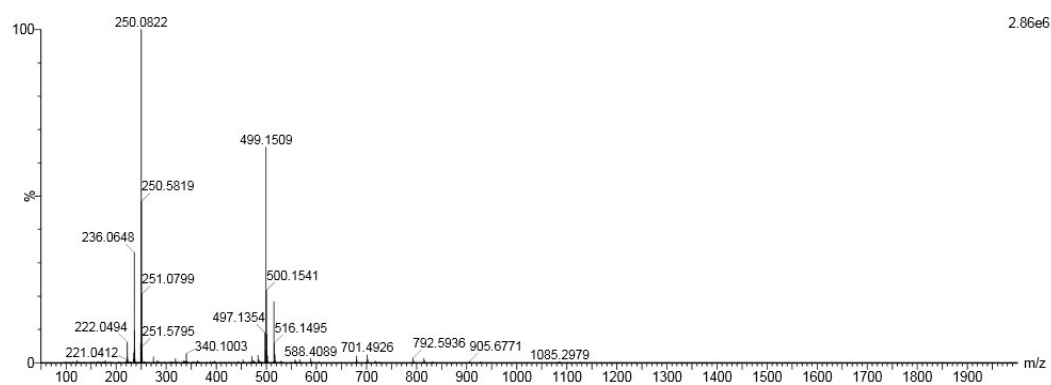

Fig. S13 HRMS (LC/MS) spectra of the protonated DpCy7. The peak at  $m/z = 250.0822$  was assigned to the mass of  $[\text{DpCy7-2BF}_4]^{2+}$ .

## References

- [1]. D. Oushiki , H. Kojima , T. Terai, M. Arita, K. Hanaoka, Y. Urano and T Nagano, *J. Am. Chem. Soc.*, 2010,**132**,2795.
- [2]. A. R. Katritzky, K. Chen, Y. Wang, M. Karelson, B. Lucic, N. Trinajstic, T. Suzuki, G. Schüürmann *J. Phys. Org. Chem.* 2000, **13**, 80.
